# Supplementary material for: Self-recovering β-cyclodextrin gel controlled by good/poor solvent environments
Source: Royal Society of Chemistry journal article supplement (doi:10.1039/c3ra42587h), 2013-01-01
Supplement: c3ra42587h.pdf [file c3ra42587h.pdf]

## Self-recovering $\beta$ -cyclodextrin gel controlled by good/poor solvent environments

Pengyao Xing, Xiaoxiao Chu, Shangyang Li, Yuehui Hou, Mingfang Ma, Jingshu Yang, Aiyu Hao\*

*School of Chemistry and Chemical Engineering and Key Laboratory of Colloid and Interface Chemistry of Ministry of Education, Shandong University, Jinan 250100, PR China.*

Table S1 Various poor solvents as gel promoters

| Entry | Solvents             | State |
|-------|----------------------|-------|
| 1     | Methanol             | G     |
| 2     | Alcohol              | G     |
| 3     | Isopropanol          | G     |
| 4     | Glycol               | G     |
| 5     | Glycerol             | G     |
| 6     | Formic acid          | G     |
| 7     | Acetic acid          | G     |
| 8     | Pentanol             | P     |
| 9     | Octanol              | P     |
| 10    | Phenylcarbinol       | P     |
| 11    | Dichloromethane      | P     |
| 12    | Chloroform           | P     |
| 13    | Cyclohexane          | PS    |
| 14    | Petroleum ether      | PS    |
| 15    | Acetonitrile         | P     |
| 16    | 4-methyl-2-pentanone | S     |
| 17    | 1,2-propane diamine  | S     |
| 18    | Acetone              | S     |
| 19    | Tetrahydrofuran      | S     |
| 20    | Ethyl acetate        | S     |
| 21    | Diethylamine         | S     |

\*Corresponding author. Tel.: +86 531 88363306; fax: 86 531 88564464.  
E-mail address: haoay@sdu.edu.cn (A. Hao)

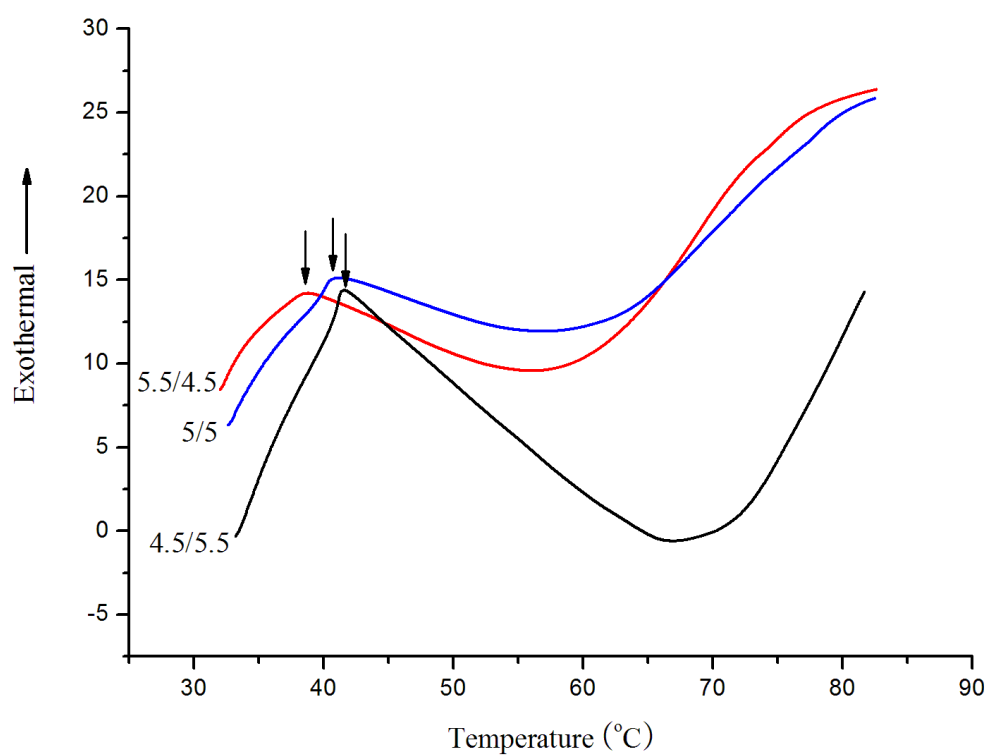

Fig. S1 DSC curves of gels at different solvent ratios (DMF/water, v/v),  $C_{\beta\text{-CD}}=100\text{mM}$ .

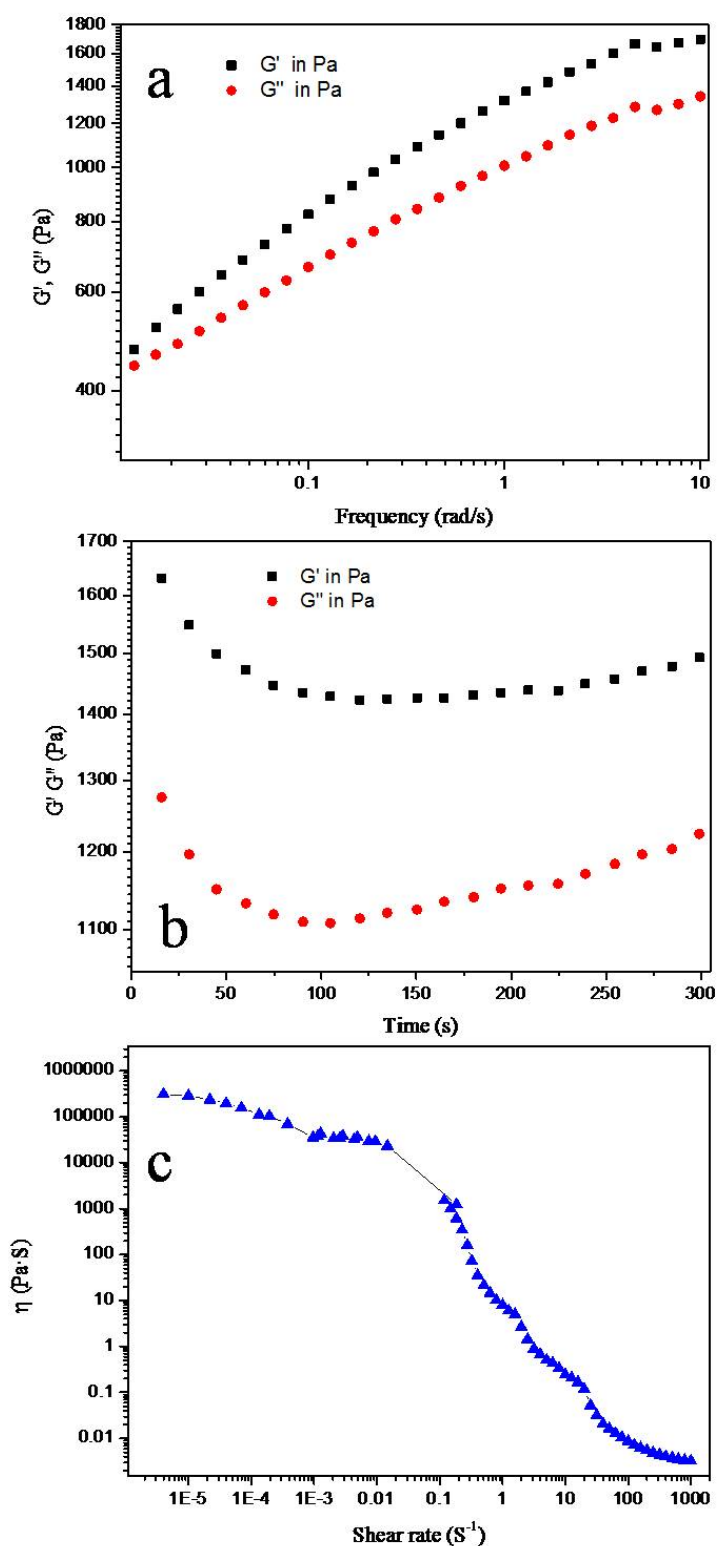

Fig. S2 The rheology measurements with the model of dynamic frequency sweep (a), time sweep (b,  $f=1\text{Hz}$ ), shear rate sweep (c) of the gel containing NaCl, with the volume ratio of DMF/H<sub>2</sub>O = 4/6, C<sub>β-CD</sub> = 100 mM, 20°C, C<sub>NaCl</sub> = 1.0 M.
